# Supplementary figures and images for: Sleep–wake behavior, perceived fatigability, and cognitive reserve in older adults
Source: PubMed Central journal article supplement — Alzheimers Dement. 2024 May 1;20(6):4020–31. doi: 10.1002/alz.13802 (PMC11180948; doi:10.1002/alz.13802), 2024-05-01

### Supplement Figure A

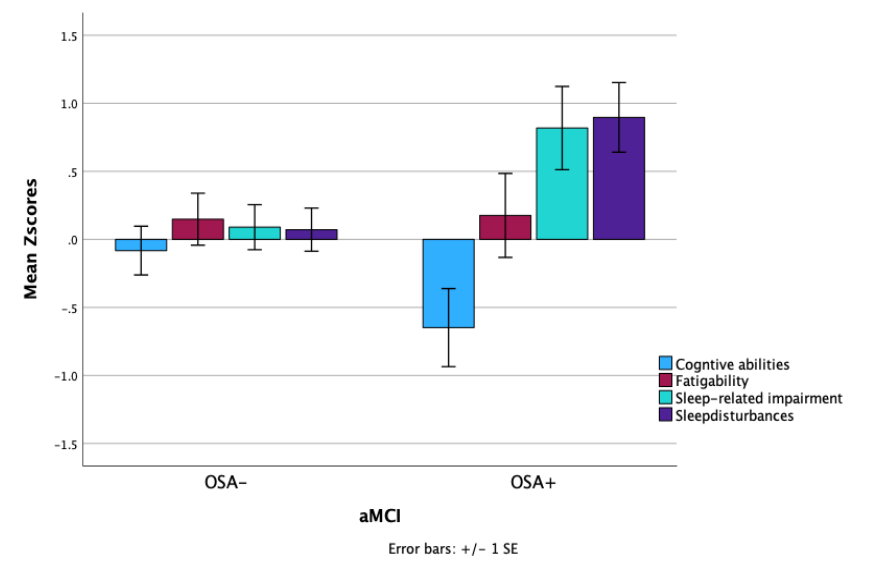

### Supplement Figure B

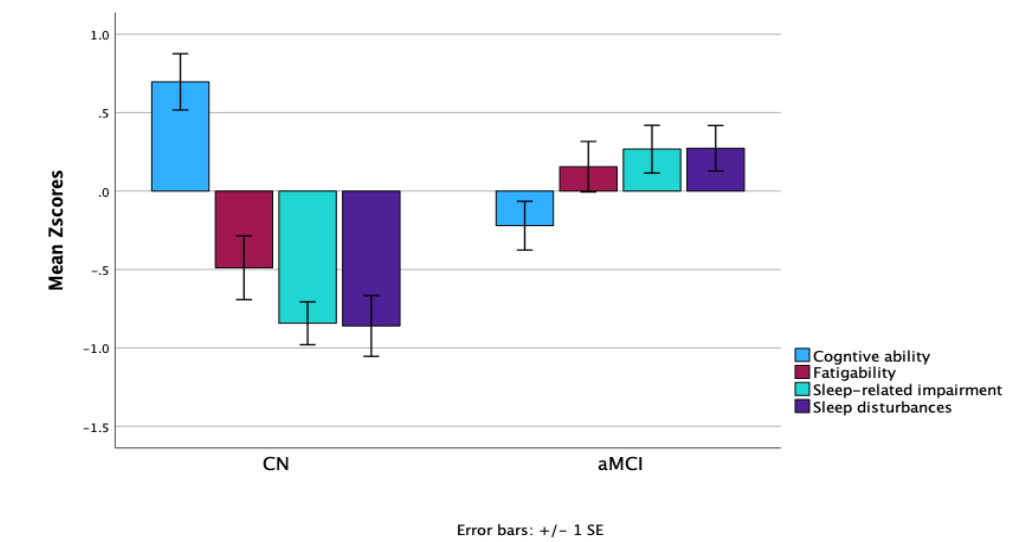

Supplement: ALZ-20-4020-s002.pdf [file ALZ-20-4020-s002.pdf]
